# Supplementary material for: Compound-tunable embedding potential method: analysis of pseudopotentials for Yb in YbF2, YbF3, YbCl2 and YbCl3 crystals
Source: Royal Society of Chemistry journal article supplement (doi:10.1039/d2cp01738e), 2022-01-01
Supplement: d2cp01738e1.pdf [file d2cp01738e1.pdf]

## Supplementary materials for article:

### “Compound-tunable embedding potential method: Analysis of pseudopotentials for Yb in YbF<sub>2</sub>, YbF<sub>3</sub>, YbCl<sub>2</sub> and YbCl<sub>3</sub> crystals”

Vera M. Shakhova,<sup>\*a</sup> Daniil A. Maltsev,<sup>a</sup> Yuriy V. Lomachuk,<sup>a</sup> Nikolai S. Mosyagin,<sup>a</sup> Leonid V. Skripnikov,<sup>a,b</sup> and Anatoly V. Titov<sup>a†</sup>

Compound-tunable embedding potential (CTEP) method developed in [Lomachuk *et al.*, *PCCP*, 2020, **22**, 17922; Maltsev *et al.*, *PRB*, 2021, **103**, 205105] to describe electronic structure of fragments and point defects in materials is applied to crystals containing periodically arranged lanthanide atoms, which can have open *4f* shell. We consider YbF<sub>2</sub>, YbF<sub>3</sub>, YbCl<sub>2</sub>, and YbCl<sub>3</sub> crystals for the pilot CTEP studies such that *4f* electrons are not treated explicitly at the CTEP generation stages. Instead, the pseudopotentials with 60 and 59 electrons in core for Yb(II) and Yb(III), correspondingly, are applied and the latter treats the “*4f*-hole in core”. At the final stage, the two-component embedded cluster study of fragments of YbHal<sub>2</sub> and YbHal<sub>3</sub> crystals (Hal = F, Cl) is performed using the CTEP method and relativistic pseudopotential with 28 electrons in core for central Yb atom. Remarkable agreement of the electronic densities within the YbHal<sub>2</sub> fragments with those of the original periodic crystal calculation is demonstrated. The calculated internuclear distances between the central Yb and nearest halide atoms are in pretty good agreement with the experimental data, the deviations are within 0.015 Å for all the studied crystals. Thus, the overall accuracy for the crystal characteristics evaluated with using CTEP in the combined periodic-structure and embedded cluster study is comparable with that of Yb-containing molecular calculations.

---

<sup>a</sup> Petersburg Nuclear Physics Institute named by B.P. Konstantinov of National Research Center “Kurchatov Institute” (NRC “Kurchatov Institute” – PNPI), 188300, mkr. Orlova roscha, 1., Gatchina, Leningradskaya oblast, Russian Federation

<sup>b</sup> Saint Petersburg State University (SPBU), 199034, 7-9 Universitetskaya Embankment, Saint Petersburg, Russian Federation

\* E-mail: shakhova\_vm@pnpi.nrcki.ru

† E-mail: titov\_av@pnpi.nrcki.ru

Table 1 The basic sets for ytterbium atom that were used in this work. The Gaussians that were used only for cluster calculations are marked in parentheses.

| Basis sets for ytterbium, which were made for following PPs |          |           |          |           |         |            |           |              |             |              |
|-------------------------------------------------------------|----------|-----------|----------|-----------|---------|------------|-----------|--------------|-------------|--------------|
|                                                             | lc-PP    |           |          |           | mc-PP   |            |           |              | sc-PP       |              |
|                                                             | 2ve-PP   |           | 3ve-PP   |           | 10ve-PP |            | 11ve-PP   |              | 42ve-PP     |              |
|                                                             | Exp      | Coeff     | Exp      | Coeff     | Exp     | Coeff      | Exp       | Coeff        | Exp         | Coeff        |
| s                                                           | 1.703353 | 0.032943  | 1.606205 | 0.032835  | 5.66229 | -0.2395634 | 23.69822  | -0.86659     | 23.69822    | -0.86659     |
|                                                             | 0.359455 | -0.477703 | 0.735687 | 0.011886  | 3.05589 | 0.8934967  | 18.30547  | 1.59105      | 18.30547    | 1.59105      |
|                                                             |          |           |          |           | 1.07726 | -0.6980144 | 6.02665   | 1.0000000    | 6.02665     | 1.0000000    |
|                                                             |          |           |          |           |         |            | 2.93645   | 1.0000000    | 2.93645     | 1.0000000    |
|                                                             |          |           |          |           |         |            | 1.38490   | 1.0000000    | 1.38490     | 1.0000000    |
|                                                             |          |           |          |           | 0.44751 | 1.0000000  | 0.85837   | 1.0000000    | 0.85837     | 1.0000000    |
|                                                             | 0.298340 | 1.0000000 | 0.39304  | 1.0000000 | 0.29834 | 1.0000000  | 0.39304   | 1.0000000    | (0.39304)   | (1.0000000)  |
|                                                             | 0.132600 | 1.0000000 |          |           | 0.13260 | 1.0000000  |           |              | (0.11464)   | (1.0000000)  |
| p                                                           | 0.292208 | -0.201665 | 0.653783 | 0.005863  | 4.07728 | 0.0914961  | 23.92973  | -0.034234    | 23.92973    | -0.034234    |
|                                                             | 0.146922 | 0.097861  | 0.336487 | -0.253364 | 3.39773 | -0.2494782 | 13.21051  | -0.42757     | 13.21051    | -0.42757     |
|                                                             |          |           |          |           | 0.78282 | 0.4112846  | 10.39351  | 1.09428      | 10.39351    | 1.09428      |
|                                                             |          |           |          |           |         |            | 12.51956  | 1.0000000    | 12.51956    | 1.0000000    |
|                                                             |          |           |          |           |         |            | 4.02239   | 1.0000000    | 4.02239     | 1.0000000    |
|                                                             |          |           |          |           | 1.64606 | 1.0000000  | 1.72446   | 1.0000000    | 1.72446     | 1.0000000    |
|                                                             |          |           |          |           | 0.34423 | 1.0000000  | 0.70647   | 1.0000000    | 0.70647     | 1.0000000    |
|                                                             | 0.13929  | 1.0000000 | 0.29693  | 1.0000000 | 0.13929 | 1.0000000  | 0.29693   | 1.0000000    | (0.29693)   | (1.0000000)  |
| d                                                           | 2.392979 | -0.013914 | 3.20980  | -0.042259 |         |            | 54.12548  | -0.46786E-02 | 54.12548    | -0.46786E-02 |
|                                                             | 0.825371 | 0.276282  | 1.371021 | 0.137661  |         |            | 9.089210  | 0.19280      | 9.089210    | 0.19280      |
|                                                             | 0.284682 | 0.541616  | 0.585579 | 0.393576  |         |            | 4.42200   | 0.21885      | 4.42200     | 0.21885      |
|                                                             |          |           |          |           |         |            | 2.14170   | 1.0000000    | 2.14170     | 1.0000000    |
|                                                             |          |           |          |           | 0.61623 | 1.0000000  | 0.77727   | 1.0000000    | 0.77727     | 1.0000000    |
|                                                             | 0.18155  | 1.0000000 | 0.32550  | 1.0000000 | 0.18155 | 1.0000000  | 0.32550   | 1.0000000    | (0.32550)   | (1.0000000)  |
| f                                                           |          |           |          |           |         |            | 132.7621  | 0.59655E-02  | 132.7621    | 0.59655E-02  |
|                                                             |          |           |          |           |         |            | 43.76773  | 0.03721      | 43.76773    | 0.03721      |
|                                                             |          |           |          |           |         |            | 16.92991  | 0.11234      | 16.92991    | 0.11234      |
|                                                             |          |           |          |           |         |            | 6.97518   | 0.17748      | 6.97518     | 0.17748      |
|                                                             |          |           |          |           |         |            | 2.80817   | 1.0000000    | 2.80817     | 1.0000000    |
|                                                             |          |           |          |           | 1.02851 | 1.0000000  | 1.02851   | 1.0000000    | 1.02851     | 1.0000000    |
|                                                             | 0.31000  | 1.0000000 | 0.31000  | 1.0000000 | 0.31000 | 1.0000000  | 0.3100000 | 1.0000000    | (0.3100000) | (1.0000000)  |

Table 2 Large-core pseudopotentials for ytterbium atom that were used in this work. For compound-tunable lc-PP, exponent with (\*) equals 0.2267468 and 0.2484787 for YbF<sub>2</sub> and YbCl<sub>2</sub> compounds, accordingly; exponent with (\*\*) equals 0.4485319 and 0.4492845 for YbF<sub>3</sub> and YbCl<sub>3</sub> compounds, accordingly.

| lc-PP for Yb |                                    |                                                  |             |                                    |                                                  |             |
|--------------|------------------------------------|--------------------------------------------------|-------------|------------------------------------|--------------------------------------------------|-------------|
|              | n <sub>core</sub> = 68<br>Exponent | 2ve-PP<br>l <sub>max</sub> = 4<br>r <sup>n</sup> | Coefficient | n <sub>core</sub> = 67<br>Exponent | 3ve-PP<br>l <sub>max</sub> = 4<br>r <sup>n</sup> | Coefficient |
| g            | 12.1426975                         | 1                                                | -15.2386012 | 1.1833077                          | 1                                                | -12.4579302 |
|              | 3.6608059                          | 1                                                | -14.5775174 |                                    |                                                  |             |
|              | 0.9869034                          | 1                                                | -7.9349017  |                                    |                                                  |             |
|              | 0.3559306                          | 1                                                | -0.8397914  |                                    |                                                  |             |
| s-g          | 0.1198414                          | 0                                                | 10.0000000  | 0.4752020                          | 0                                                | 10.0000000  |
|              | 8.2657933                          | 1                                                | 22.7174604  | 1.1833077                          | 1                                                | 12.4579302  |
|              | 1.4990175                          | 1                                                | 11.7793783  |                                    |                                                  |             |
|              | 0.1876474                          | 2                                                | -2.0249546  |                                    |                                                  |             |
| p-g          | 0.2757268                          | 0                                                | 9.0000000   | 0.2839004 (**)                     | 0                                                | 9.0000000   |
|              | 9.9771245                          | 1                                                | 19.3438417  | 1.1833077                          | 1                                                | 12.4579302  |
|              | 2.3035432                          | 1                                                | 13.5516361  |                                    |                                                  |             |
|              | 0.5285219                          | 1                                                | 3.1375203   |                                    |                                                  |             |
| d-g          | 2.5235783                          | 0                                                | 7.0000000   | 5.9601207                          | 0                                                | 7.0000000   |
|              | 9.9798004                          | 1                                                | 14.8276980  | 1.1833077                          | 1                                                | 12.4579302  |
|              | 2.2132429                          | 1                                                | 15.4139348  |                                    |                                                  |             |
|              | 0.1344036                          | 1                                                | -0.2753461  |                                    |                                                  |             |
| f-g          | 0.6068395 (*)                      | 0                                                | 4.0000000   | 1.0482995                          | 0                                                | 4.0000000   |
|              | 12.1426975                         | 1                                                | 15.2386012  | 1.1833077                          | 1                                                | 12.4579302  |
|              | 3.6608059                          | 1                                                | 14.5775174  |                                    |                                                  |             |
|              | 0.9869034                          | 1                                                | 7.9349017   |                                    |                                                  |             |
|              | 0.3559306                          | 1                                                | 0.8397914   |                                    |                                                  |             |

Table 3 Medium-core pseudopotentials for ytterbium atom that were used in this work.

| mc-PP for Yb |                        |                      |              |                        |                      |              |            |
|--------------|------------------------|----------------------|--------------|------------------------|----------------------|--------------|------------|
|              | $n_{\text{core}} = 60$ | 10ve-PP              |              | $n_{\text{core}} = 59$ | 11ve-PP              |              |            |
|              | Exponent               | $l_{\text{max}} = 4$ | Coefficient  | Exponent               | $l_{\text{max}} = 4$ | Coefficient  |            |
|              |                        | $r^n$                |              |                        | $r^n$                |              |            |
| g            | 28.0911153             | 1                    | -20.9275297  | 28.5078345             | 1                    | -17.3720028  |            |
|              | 20.5917581             | 1                    | 73.3189526   | 20.6456816             | 1                    | 62.6511064   |            |
|              | 15.1315885             | 1                    | -56.3156303  | 14.7718856             | 1                    | -49.4713307  |            |
|              | 3.7895130              | 1                    | -12.2315386  | 3.8867871              | 1                    | -11.7762364  |            |
|              | 1.3010428              | 1                    | -4.1563613   | 1.3774110              | 1                    | -3.0004553   |            |
|              | 0.8542142              | 1                    | 0.7630462    | 0.4491757              | 1                    | -0.3443483   |            |
|              | 0.5583110              | 1                    | -0.8963727   | 0.2814416              | 1                    | 0.0775801    |            |
|              | 0.1848613              | 1                    | -0.0295597   | 0.1695274              | 1                    | -0.0186098   |            |
|              | 0.1158813              | 2                    | 0.0001565    | 0.0981397              | 2                    | 0.0003351    |            |
|              | 0.0549310              | 2                    | -0.0000092   | 0.0409101              | 2                    | -0.0000147   |            |
|              | 0.0174546              | 2                    | -0.0000023   | 0.0132964              | 2                    | -0.0000008   |            |
|              | s-g                    | 14.8864634           | 0            | 10.0000000             | 15.0652965           | 0            | 10.0000000 |
|              |                        | 20.3783278           | 1            | 15.1304038             | 21.2163730           | 1            | 14.9214061 |
| 20.3160267   |                        | 2                    | -216.7470797 | 20.6023494             | 2                    | -215.7768483 |            |
| 14.8864650   |                        | 2                    | 299.7971581  | 15.0652965             | 2                    | 301.0973948  |            |
| 3.5889931    |                        | 2                    | 163.6607952  | 3.6049965              | 2                    | 164.7967825  |            |
| 2.6702312    |                        | 2                    | -92.6457163  | 2.6870671              | 2                    | -92.2349851  |            |
| 1.9593045    |                        | 2                    | 20.6998650   | 1.9747408              | 2                    | 18.6983031   |            |
| 0.3589311    |                        | 2                    | 0.0699011    | 0.3170567              | 2                    | 0.0104376    |            |
| 0.2368430    |                        | 2                    | -0.0187870   | 0.2056531              | 2                    | -0.0035788   |            |
| p-g          |                        | 2.3975801            | 0            | 9.0000000              | 19.6090345           | 0            | 9.0000000  |
|              | 29.5204845             | 1                    | 32.1195478   | 19.4297994             | 1                    | -32.4109446  |            |
|              | 20.6721605             | 1                    | -91.1075481  | 9.6150372              | 1                    | 96.3648985   |            |
|              | 14.3684138             | 1                    | 75.0601845   | 1.1176714              | 1                    | -47.9409481  |            |
|              | 3.2254444              | 2                    | 56.3095791   | 3.7688912              | 2                    | 131.1092861  |            |
|              | 2.3975801              | 2                    | -22.3039990  | 2.1069201              | 2                    | 8.5017036    |            |
|              | 1.7503254              | 2                    | 3.3613521    | 1.5164804              | 2                    | 36.9668225   |            |
|              | 0.5224168              | 2                    | 0.1343950    | 1.0708112              | 2                    | 14.4977366   |            |
|              | 0.0617217              | 2                    | -0.0004131   | 0.7559869              | 2                    | -0.0897142   |            |
|              | 0.0371704              | 2                    | 0.0002820    | 0.5237791              | 2                    | 0.0037375    |            |
|              | 0.0222136              | 2                    | -0.0000693   | 0.0375115              | 2                    | 0.0000177    |            |
|              | d-g                    | 38.8596928           | 0            | 7.0000000              | 38.7587374           | 0            | 7.0000000  |
|              |                        | 10.5899224           | 1            | 91.1323893             | 10.7082326           | 1            | 90.1660572 |
| 4.7884406    |                        | 1                    | -16.2551241  | 4.6255379              | 1                    | -1.5100076   |            |
| 3.1823270    |                        | 1                    | 279.0564279  | 3.1697505              | 1                    | 284.6892687  |            |
| 1.4882586    |                        | 1                    | -338.4892772 | 1.6729490              | 1                    | -358.0786118 |            |
| 1.7493084    |                        | 2                    | 374.9429646  | 1.8922597              | 2                    | 377.0266229  |            |
| 0.8737250    |                        | 2                    | 5.8544893    | 0.7763756              | 2                    | 1.2774933    |            |
| 0.5843255    |                        | 2                    | -0.8087249   | 0.5092806              | 2                    | -0.2560451   |            |
| 0.0749260    |                        | 2                    | -0.0030742   | 0.0842930              | 2                    | -0.0021938   |            |
| f-g          |                        | 5.3972773            | 0            | 4.0000000              | 4.6451229            | 0            | 4.0000000  |
|              | 1.8280874              | 1                    | 26.7002567   | 1.4621505              | 1                    | 24.6533742   |            |
|              | 0.6501774              | 1                    | 1.4901331    | 0.5664228              | 1                    | 0.4741747    |            |
|              | 0.2052912              | 1                    | 0.1432826    | 0.0443210              | 1                    | 0.0047029    |            |
|              | 0.0188892              | 1                    | -0.0000447   | 0.0320904              | 1                    | -0.0019114   |            |

Table 4 Small-core pseudopotentials for ytterbium atom that were used in this work. Spin-orbit part was not included in periodic calculations, but it was used in clusters calculations.

| lc-PP for Yb   |                        |                      |               |             |                                  |            |             |
|----------------|------------------------|----------------------|---------------|-------------|----------------------------------|------------|-------------|
| sc-PP, 42ve-PP |                        |                      |               |             |                                  |            |             |
|                | $n_{\text{core}} = 28$ | $l_{\text{max}} = 3$ |               |             | $l_{\text{max}}^{\text{so}} = 4$ | Spin-orbit |             |
|                | Exponent               | $r^n$                | Coefficient   |             | Exponent                         | $r^n$      | Coefficient |
| f              | 393.3778330            | 1                    | -13.9350552   | p-SpinOrbit | 36.3960764                       | 1          | -2.8983573  |
|                | 290.9108996            | 1                    | 42.9982597    |             | 26.0036764                       | 1          | 25.7649421  |
|                | 217.2246880            | 1                    | -34.5780535   |             | 18.3131485                       | 1          | -49.7867563 |
|                | 47.3835015             | 1                    | -9.9869518    |             | 11.1848920                       | 1          | 38.5415042  |
|                | 16.5563358             | 1                    | -1.7523321    |             | 6.0116579                        | 1          | -14.2979100 |
|                | 2.6083357              | 2                    | 0.0634998     |             | 3.1974227                        | 1          | 5.5571864   |
|                | 0.9133649              | 2                    | 0.0061097     |             | 1.6111050                        | 1          | -2.0956344  |
|                | 0.3587417              | 2                    | -0.0000728    |             | 0.7862135                        | 1          | 0.8606535   |
|                |                        |                      |               |             | 0.3667289                        | 1          | -0.4018655  |
| s-f            | 134.0286034            | 0                    | 6.0000000     |             | 0.1802831                        | 1          | 0.2781659   |
|                | 37.4815435             | 1                    | 431.1583378   |             | 0.0807875                        | 1          | -0.1532202  |
|                | 26.6166901             | 1                    | -366.7463438  |             | 0.0659333                        | 2          | 0.0285462   |
|                | 26.8473429             | 2                    | -1089.1177110 |             | 0.0406617                        | 2          | -0.0073401  |
|                | 19.2682415             | 2                    | 3653.6259232  |             | 0.0250163                        | 2          | 0.0010489   |
|                | 13.8715524             | 2                    | -2931.4492940 | d-SpinOrbit | 71.1494532                       | 1          | 0.2475452   |
|                | 9.8967735              | 2                    | 1621.0237256  |             | 20.1908161                       | 1          | -1.6558115  |
|                | 6.9897690              | 2                    | -683.6851818  |             | 14.8929508                       | 1          | 1.5851440   |
|                | 4.8791455              | 2                    | 220.3474487   |             | 9.3696110                        | 2          | 0.2289516   |
|                | 3.3520194              | 2                    | -51.7868352   |             | 2.8854225                        | 2          | -0.0064624  |
|                | 2.2480714              | 2                    | 7.7052612     |             | 1.2522332                        | 2          | -0.0020983  |
|                | 1.4062180              | 2                    | -0.5132751    |             | 0.0234481                        | 2          | 0.0000004   |
| p-f            | 23.4359935             | 0                    | 5.0000000     | f-SpinOrbit | 393.3778330                      | 1          | 1.8156013   |
|                | 36.3960764             | 1                    | 166.0036181   |             | 290.9108996                      | 1          | -5.9812102  |
|                | 26.0036764             | 1                    | -422.8378703  |             | 217.2246880                      | 1          | 5.3013149   |
|                | 18.3131485             | 1                    | 383.8257841   |             | 47.3835015                       | 1          | 0.0645827   |
|                | 11.1848920             | 1                    | -97.9398029   |             | 16.5563358                       | 1          | 0.0192377   |
|                | 6.0116579              | 1                    | 23.1230723    |             | 2.6083357                        | 2          | 0.0029396   |
|                | 3.1974227              | 1                    | -7.3316100    |             | 0.9133649                        | 2          | 0.0006479   |
|                | 1.6111050              | 1                    | 2.3456439     |             | 0.3587417                        | 2          | 0.0000196   |
|                | 0.7862135              | 1                    | -0.8965902    |             |                                  |            |             |
|                | 0.3667289              | 1                    | 0.3960258     |             |                                  |            |             |
|                | 0.1802831              | 1                    | -0.2663962    |             |                                  |            |             |
|                | 0.0807875              | 1                    | 0.1452787     |             |                                  |            |             |
|                | 0.0659333              | 2                    | -0.0270102    |             |                                  |            |             |
|                | 0.0406617              | 2                    | 0.0069557     |             |                                  |            |             |
|                | 0.0250163              | 2                    | -0.0009977    |             |                                  |            |             |
| d-f            | 1.9152345              | 0                    | 3.0000000     |             |                                  |            |             |
|                | 71.1494532             | 1                    | 16.3202169    |             |                                  |            |             |
|                | 20.1908161             | 1                    | -43.4625717   |             |                                  |            |             |
|                | 14.8929508             | 1                    | 62.8809242    |             |                                  |            |             |
|                | 9.3696110              | 2                    | -53.2260833   |             |                                  |            |             |
|                | 2.8854225              | 2                    | -7.7122479    |             |                                  |            |             |
|                | 1.2522332              | 2                    | -0.1031502    |             |                                  |            |             |
|                | 0.0234481              | 2                    | -0.0000008    |             |                                  |            |             |
